# Supplementary material for: Laser assisted self-assembly of diphenylalanine: emergence of robust waveguiding properties and Fano resonances
Source: Royal Society of Chemistry journal article supplement (doi:10.1039/d0tc01510e), 2020-01-01
Supplement: d0tc01510e1.pdf [file d0tc01510e1.pdf]

## Supplementary Information

### Laser assisted self-assembly of diphenylalanine: Emergence of robust waveguiding properties and Fano resonances

Roshan Tiwari<sup>a</sup> Krishnendu Maji<sup>b</sup>, Ajmal<sup>a</sup>, Subhrokoli Ghosh<sup>a</sup>, Nirmalya Ghosh<sup>\*a</sup>, Debashish Halder<sup>\*b</sup> and Ayan Banerjee<sup>\*a</sup>

<sup>a</sup> Department of Physical Sciences, <sup>b</sup> Department of Chemical Sciences, Indian Institute of Science Education and Research Kolkata, Mohanpur 741246, Nadia, West Bengal, India.

#### Table of contents

|               |   |           |   |
|---------------|---|-----------|---|
| ESI Figure S1 | 2 | Scheme 1  | 5 |
| ESI Figure S2 | 3 | Figure S3 | 6 |
| ESI Figure S3 | 3 | Figure S4 | 6 |
| ESI Figure S4 | 4 | Figure S5 | 7 |

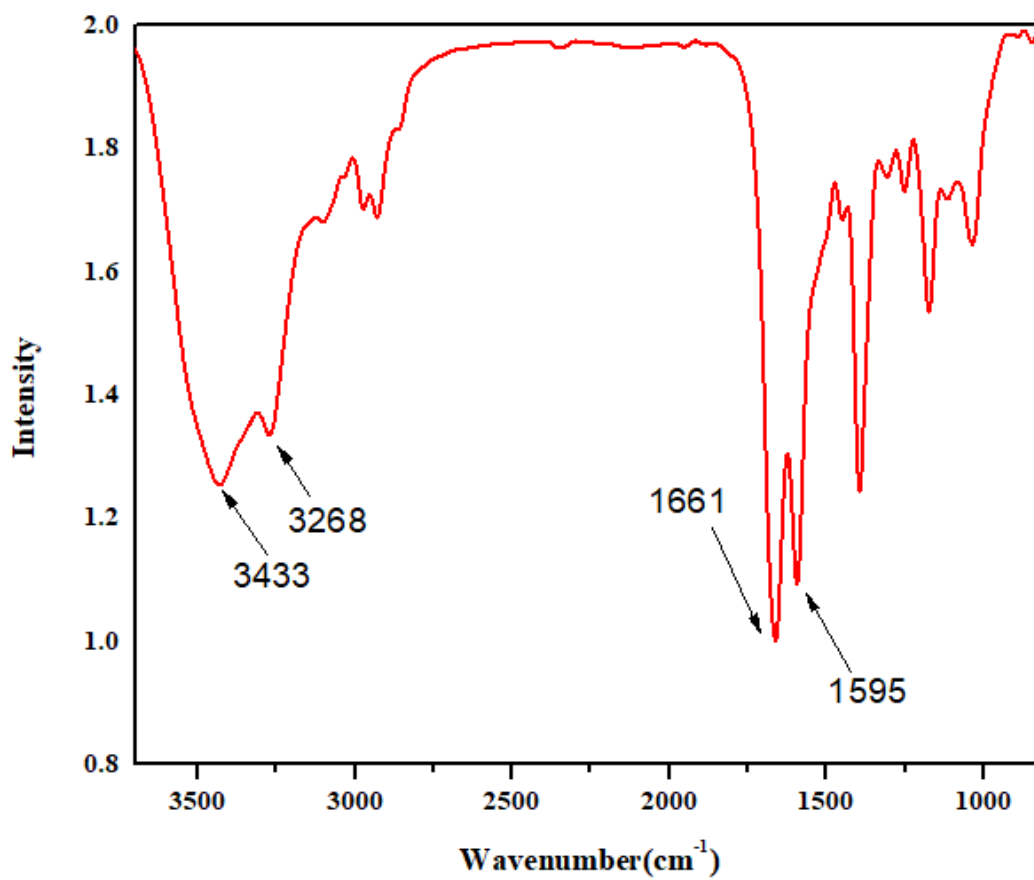

ESI Figure S1: FT-IR spectra of **Boc-Phe-Phe-OH (FF) 1**.

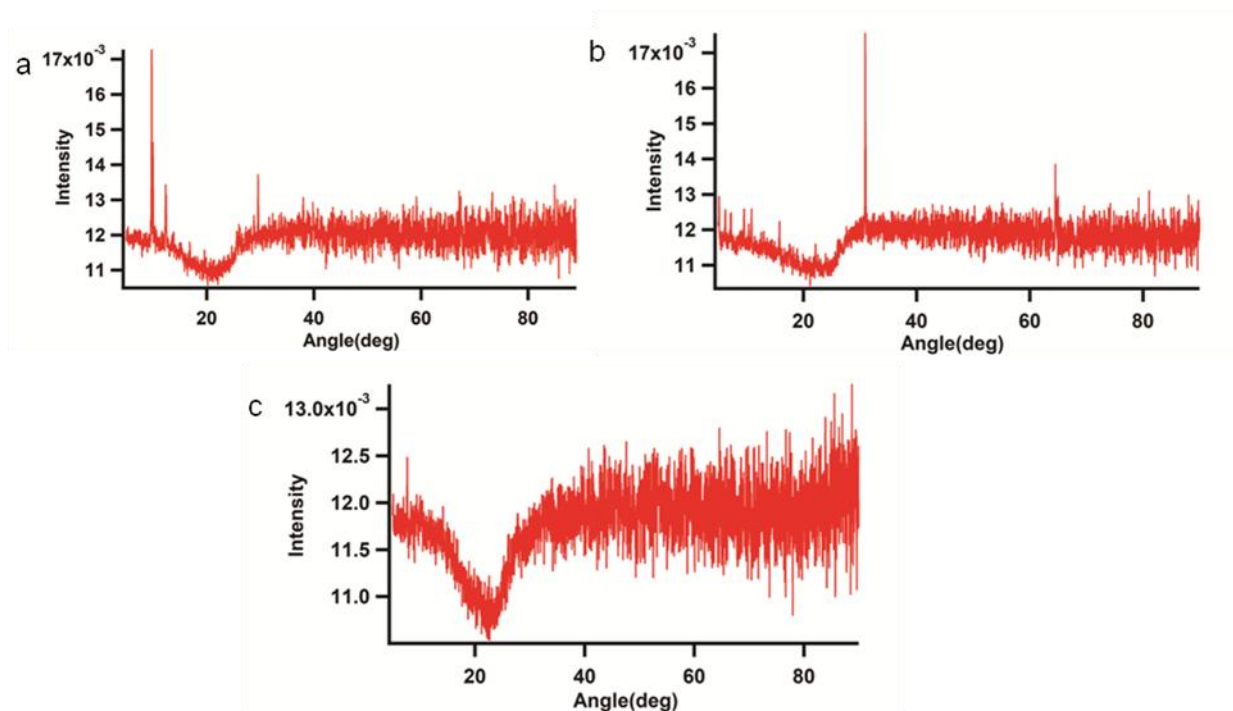

ESI **Figure S2**: PXRD pattern of (a) **SOM trail** (peaks at 9.76°, 12.36°, 29.6°), (b) **FF micro-rods** (peaks at 30.94°, 64.54°) and (c) **FF micro-ring** (peaks at 7.66°).

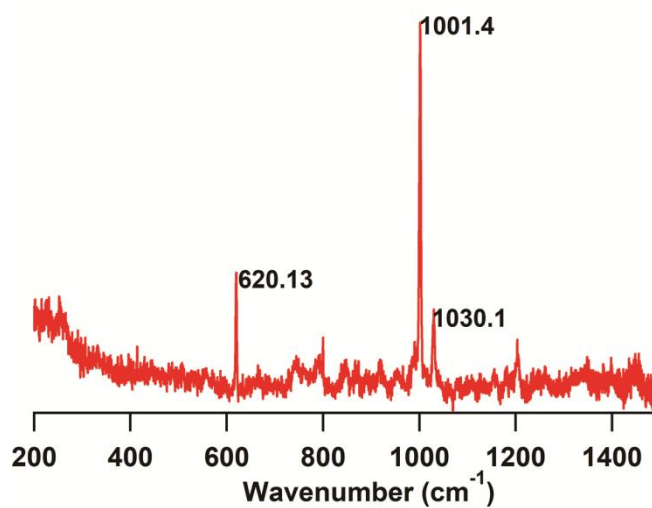

ESI **Figure S3**: Raman spectra of FF micro-rod.

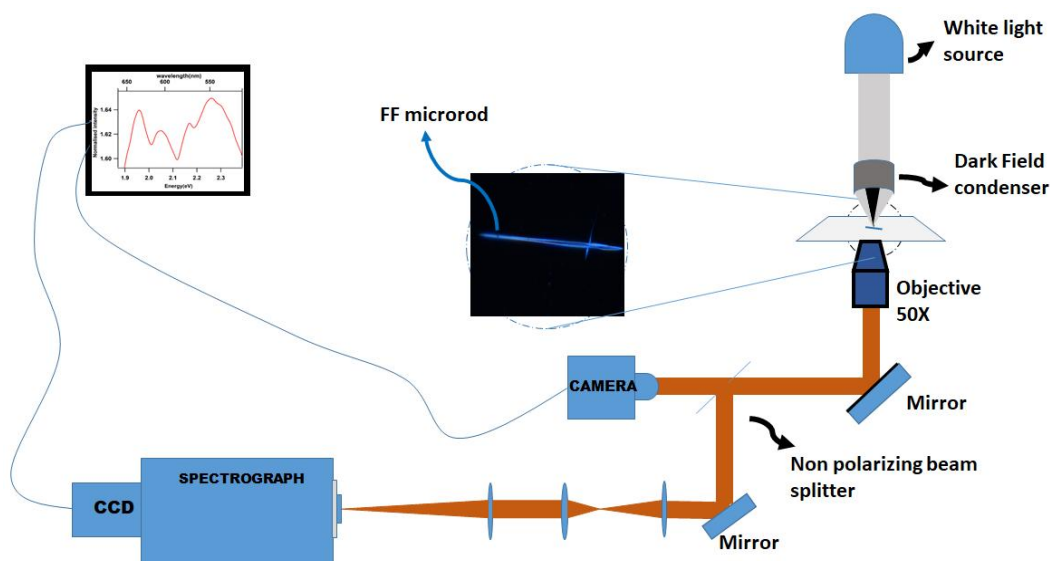

**ESI Figure S4:** Dark-field spectroscopic microscopy system: White light from the mercury lamp is focused to an annular shape at the sample (FF rod) site using a dark-field (DF) condenser. The sample-scattered light is collected by an objective (magnification 50 X) and passed through spectrally resolved signal detection system, performed by a spectrometer.

The spectral information of the FF rod can be obtained by recording the scattered light from the sample using a spectroscopic system integrated with an inverted microscope operating in the dark-field mode as shown in Figure S2. The system essentially comprises of: (i) a conventional inverted microscope (IX71, Olympus) operating in the dark-field imaging mode, and (ii) a spectrally resolved signal detection spectroscopy unit. Collimated white light from a halogen lamp (JC12 V100WHAL-L, Olympus) is used as an excitation source. The light is then focused

to an annular shape at the sample site using a dark-field condenser (Olympus U-DCD, NA = 0.8 - 0.92). The sample scattered light is collected by the microscope objective 50X (MPlanFL N, NA = 0.8), and then relayed to spectrometer (HR 2000, Ocean Optics, USA). The dark field arrangement facilitates detection of the sample scattered light (scattering spectra) exclusively.

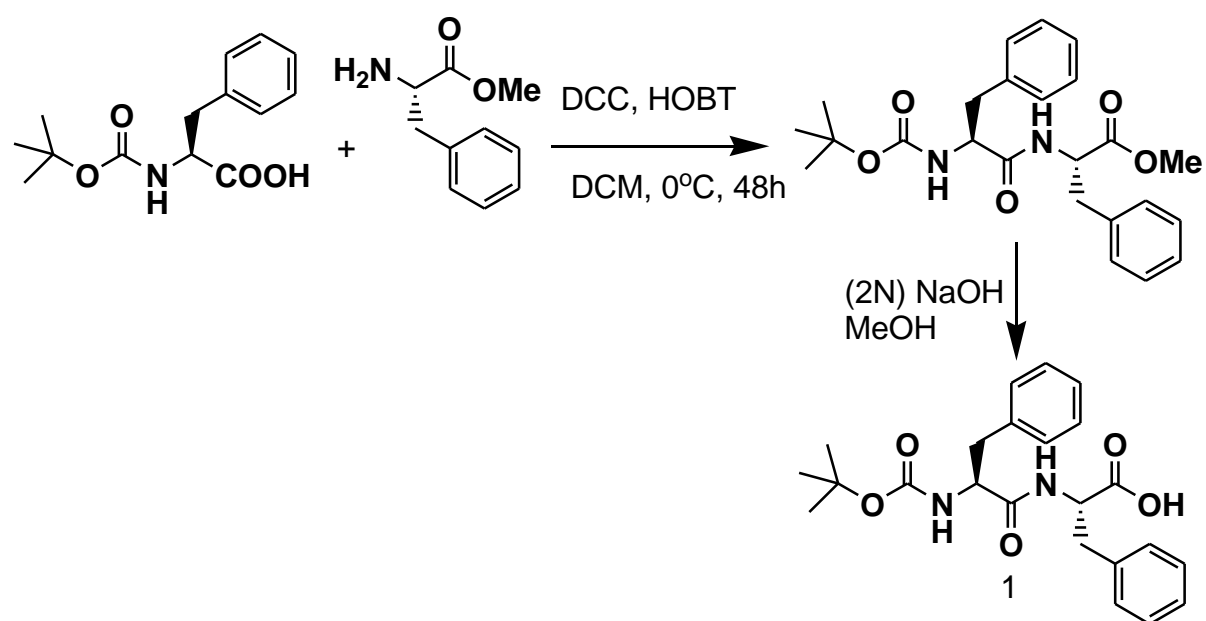

**Supplementary Scheme:** Schematic presentation of Synthesis of **FF**.

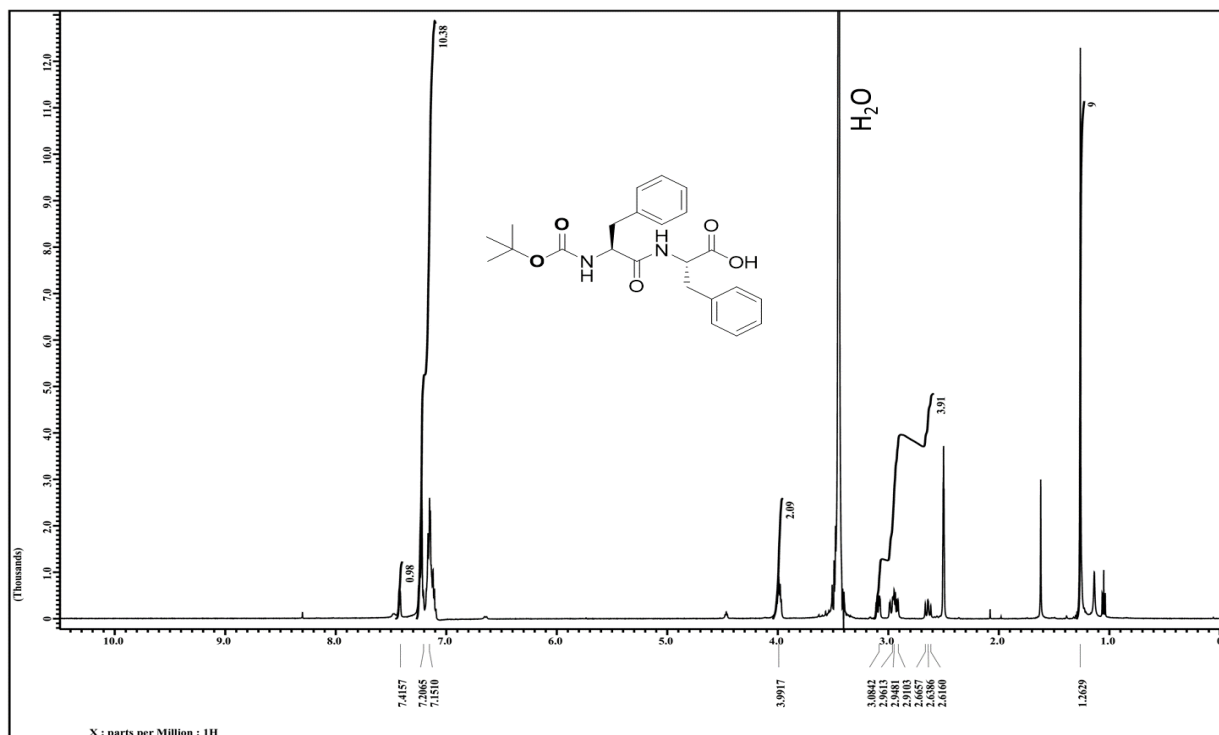

Supplementary Figure S3: <sup>1</sup>H NMR (400 MHz, DMSO-*d*<sub>6</sub>) spectra of FF.

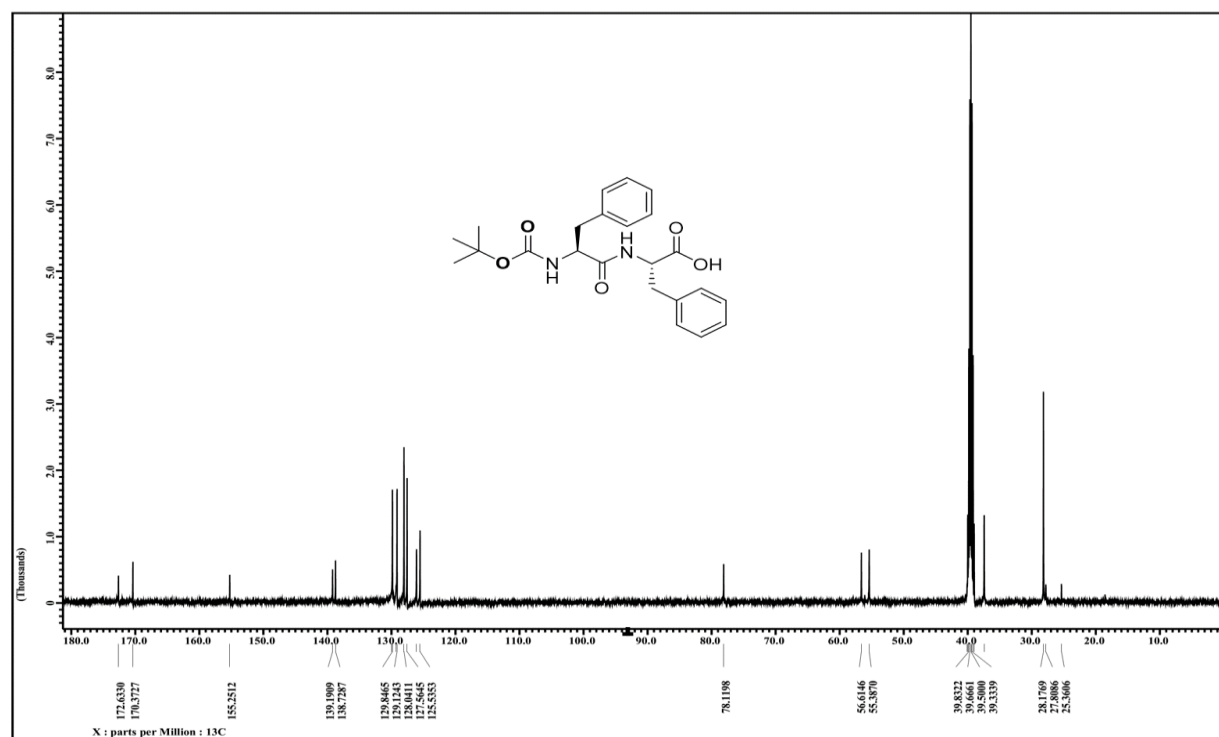

Supplementary Figure S4: <sup>13</sup>C NMR (100 MHz, DMSO-*d*<sub>6</sub>) spectra of FF.

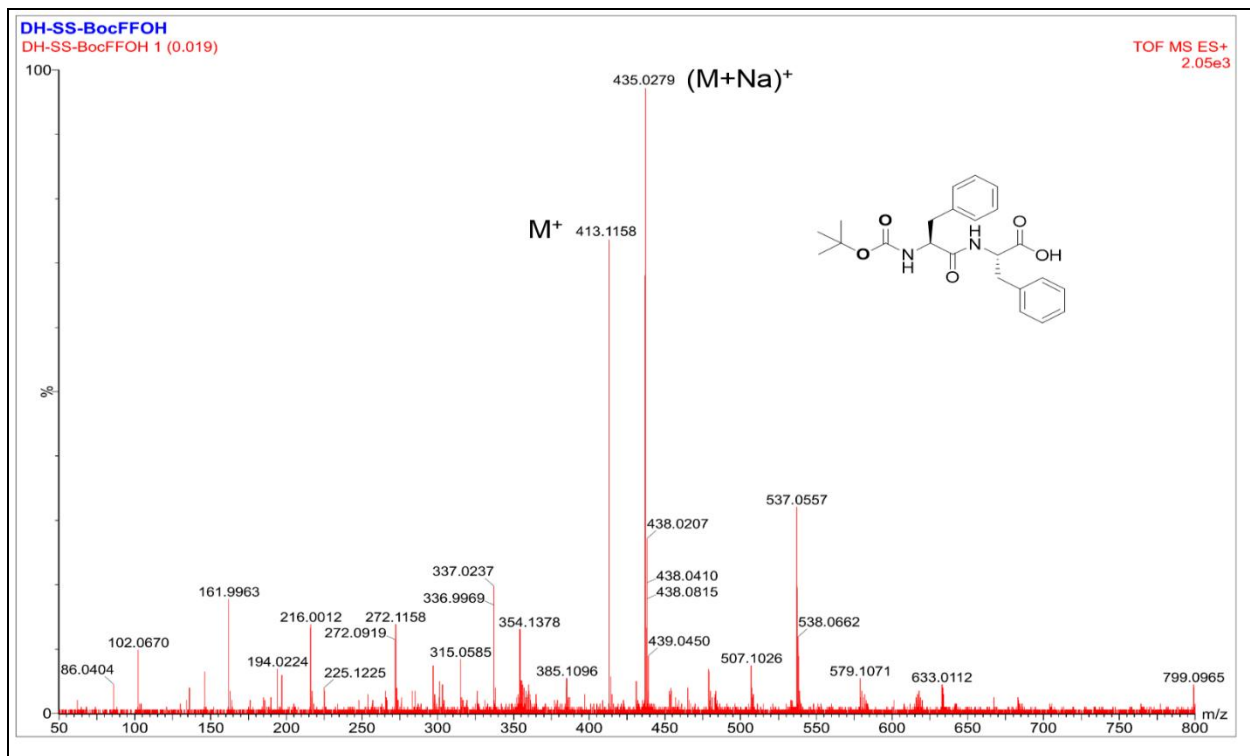

**Supplementary Figure S5: Mass Spectra of FF.**
